# Supplementary material
Source: PubMed Central journal article supplement (PMC6650361)
Supplement: NIHMS1530962-supplement-1.pdf [file NIHMS1530962-supplement-1.pdf]

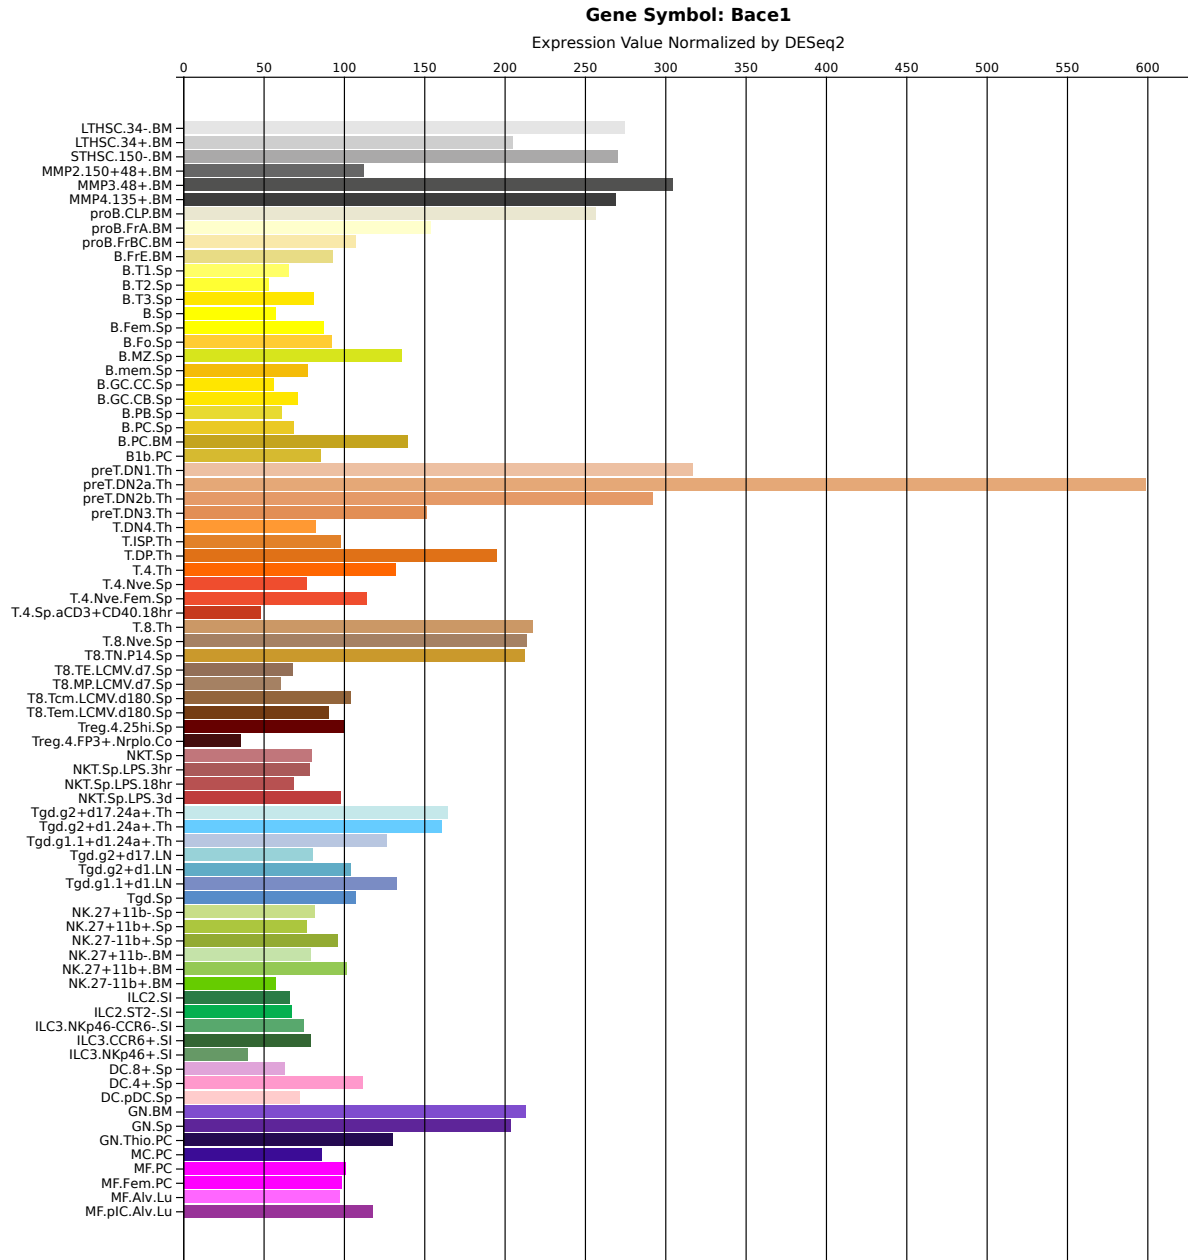

**Supplementary Figure 1:** Expression of BACE1 in sorted immune cell populations analyzed by RNA-Seq in the Immgen consortium, further information on subset gating strategies and experimental design available at <http://rstats.immgen.org/Skyline/skyline.html>
